# Supplementary material for: Assessment of Cancer Predisposition Syndromes in a National Cohort of Children With a Neoplasm
Source: PubMed Central journal article supplement (PMC9898819; doi:10.1001/jamanetworkopen.2022.54157), 2023-02-03
Supplement: jamanetwopen-e2254157-s002.pdf [file jamanetwopen-e2254157-s002.pdf]

## Data Sharing Statement

Bakhuizen. Assessment of Cancer Predisposition Syndromes in a National Cohort of Children With a Neoplasm. *JAMA Netw Open*. Published February 03, 2023.  
doi:10.1001/jamanetworkopen.2022.54157

### Data

**Data available:** No
